# Supplementary material for: RuBisCO in Non-Photosynthetic Alga Euglena longa: Divergent Features, Transcriptomic Analysis and Regulation of Complex Formation
Source: PubMed Central journal article supplement (PMC4938576; doi:10.1371/journal.pone.0158790), 2016-07-08
Supplement: pone.0158790.s001.pdf [file pone.0158790.s001.pdf]

**A**

N1 gtctatTTTTTTTcgagccaaa 22  
 P1 M R L D R Q P L L H V E K R M P T S L W L V V G A V I  
**atgcgattggaccgtcagccactgct**gc atggttgagaagcgaatgccaacatccctgtggttggtggttggtgacgattg 104  
 A A V C V V F A A S H N G T H L S A T S P P I L T T T  
 105 ctgctgTTTTTggtgTTTTgctgctccacaatggaacacactgtcagcaacttcaccaccaatccttacaccacc 184  
 S T V R I P V V Q N F E P G L T A S S N H L S N G I P  
 185 tcaactgtgCGgattccagvtgacagaTTTTgaaacaggcctgacagcctcaagcaaccacttatcaaatggaattc 264  
 P L G D S A G T E S A S R S F V A S A I L F P L C G  
 265 tccctgggtgacagtgctgggacagagatgcatcccgcagtttTgttgCGagtgcaatcctgtttccccctTgtggac 344  
 L L A T V A F I M A K K N P Q T T S L L S I A S K K D  
 345 ttcttgcaaccgtgctTTTtataatggcaagaagaatccacaacaacatct**ctcctctccatcgogtccaagaagg**at 424

P1 M E V W S P I N N R K F E T F S F L P P M T D E Q I S  
 PX . . . N R S I E . T S K . L T - - - - P E . R F T  
 P8 . . . . .  
 N1 425 atggaggtgTggagccccatcaacaacaggaagtTcgagaccttctccttTctgctccccatgactgatgagcagatttc 504  
 N2 845 ..... 924  
 N3 1265 ..... 1344  
 NX x ..... .a.gttc..t.g.g.a.cc.caa.a.t.ga.-----c.c.a...g.t.a. x+64  
 NX+1 x+387 ..... x+466  
 N8 y-401 ..... y-322

P1 K E V D M I I N K G Y S P F L E F A A P E N S S I S  
 PX R S L E R . V K E . L F . G V . Y . P . R . C F R A  
 P8 . . . . .  
 N1 505 caaggagTggacatgatcatcaacaaggggtattcccccttctggagTtTgctgccccgagaacagcagcatttcca 584  
 N2 925 ..... 1004  
 N3 1345 ..... 1424  
 NX x+65 .g.tc.c.t.g.ga..tg.a..gg...actc.t...ggtg.t..a.ac..cc...tcg...tt..tt.cgcg... x+129  
 NX+1 x+467 ..... x+546  
 N8 y-321 ..... y-242

P1 S E S T T R F S G T T S G Y Y D N R Y W T M W K L P M  
 PX K S C . A N . A D P - - - - S . D . . . . .  
 P8 . . . . .  
 N1 585 gtgagagcaccaccgctTctctggcaccacctctggctactacgacaaccggtactggacgatTggaagctgcccctg 664  
 N2 1005 ..... 1084  
 N3 1425 .....g.g.t..... 1504  
 NX x+130 agagct...ag.gaa...g...a.c.-----...g...g..... x+209  
 NX+1 x+547 ..... x+626  
 N8 y-241 ..... y-162

P1 F G C T D P S Q V L K E I D E C C K T F P Q C Y V R L  
 PX . . . . N . . . . V I . . . . I Y . . F . . . .  
 P8 . . . . .  
 N1 665 ttTgctgCactgatcccagccaggtgctgaaagaaattgatgagTgctgcaagaccttccctcagTgctatgTccgcct 744  
 N2 1085 ..... 1164  
 N3 1505 ..... 1548  
 NX x+210 .....a.....gg.cat.....a.t.a.....t..... x+289  
 NX+1 x+627 ..... x+706  
 N8 y-161 ..... y-82

P1 A A F D S I K Q V Q V I S F L V Q R P P S N V N M A  
 PX . . . P . A . . . A . . . . . D A - . S . .  
 P8 . . . . . S G S T R  
 N1 745 ggcagccttgcactccatcaagcaggtgacaggtgatctcgttctTggtgcagcgccccccagcaatgTgaacatggctg 824  
 N2 1165 ..... 1244  
 N3 .....  
 NX x+290 .....c...gca.....ca.....a.....ggatgct--...g..... x+366  
 NX+1 x+707 .....c..... x+782  
 N8 y-81 .....g..gc.g..cccg.t y-2

P1 **A M T G E K D**  
 PX . . . . .  
 P8 \*  
 N1 825 ccatgaccggtgagaaggat 844  
 N2 1245 ..... 1264  
 N3 .....  
 NX x+367 ..... x+386  
 NX+1 .....  
 N8 y-1 **ga** ..... y>4000

N8 y+1 ctgctgctgtaTTTTTTTTTcgcacatgagcttTggttgacattTgtgcaccgcaatgTgacacaccaaaggcggac y+78  
 y+79 acacctgggaaggtacaggttTccattcagctggtagaaaccgcaatTccactgtTcaccaatgctatccagTgctc y+158  
 y+159 acgcagctgCattcactcaccaagggaggataggattTgtacaacagTcaaacactgcaacattcgtgC**catcTTTT** y+238  
 y+239 **ttggTgaagtgcagaag**attgcccattgaaacatgcccaggTgtgTgtgTgcaaat y+296

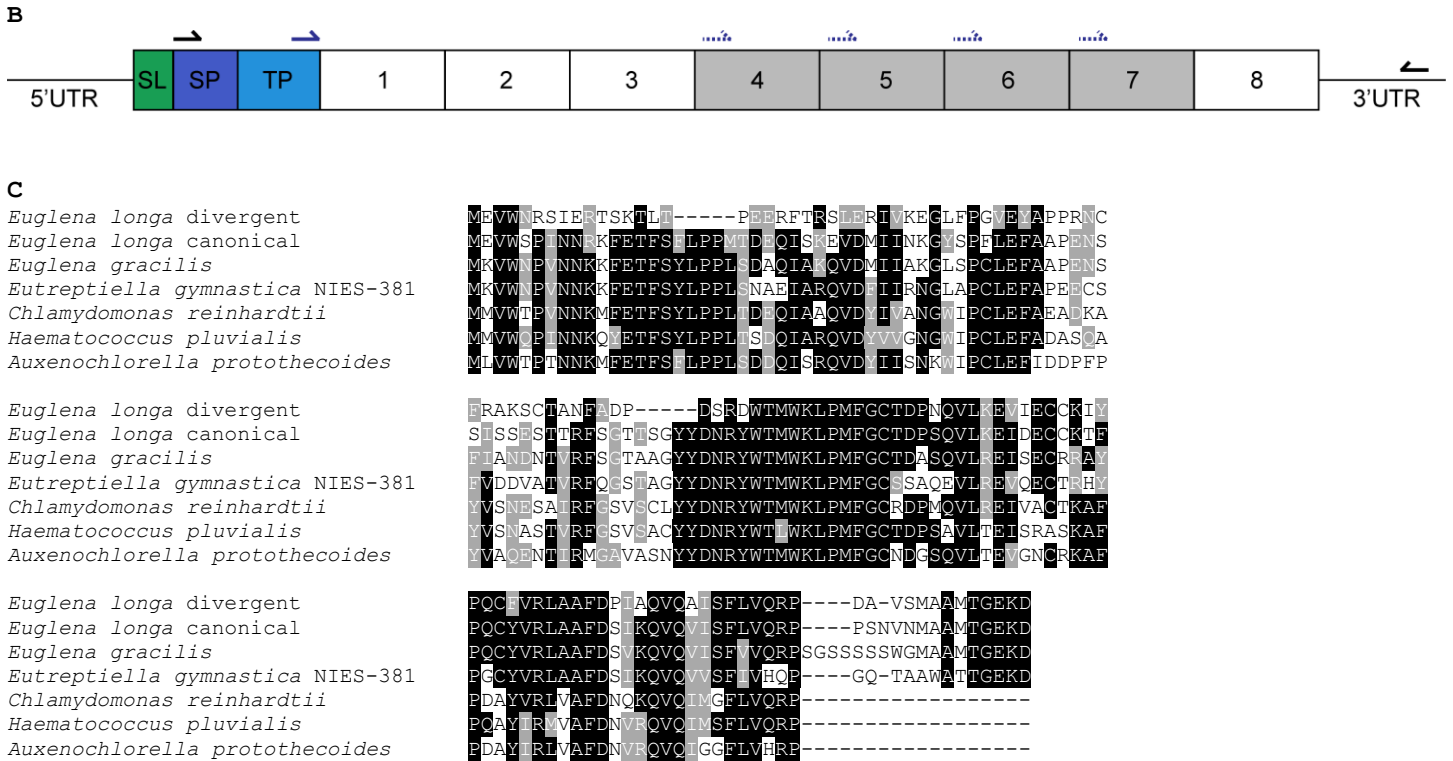

**Figure S1.** RuBisCO small subunit in *E. longa*. 1A. The partially reconstructed sequence of the *RbcS* mRNA and the corresponding RBCS precursor polyprotein in *Euglena longa*. The mRNA starts with a spliced leader sequence (in green), as is typical for mRNA molecules in Euglenozoa. Downstream is the rest of the 5'-UTR followed by the first part of the sequence encoding a predicted tripartite plastid-targeting sequence (amino acid residues in blue: dark blue represents a signal and light blue a transit peptide). The middle part of the figure (shaded in darker grey) shows an alignment of determined complete or partial sequences of repeats encoding the RBCS monomer (amino acid residues on top in black) followed by the linker decapeptide (amino acid residues on top in red). Sequences of the first two repeats (N1 and N2) are complete, the third repeat (N3) lacks the 3'-end of the sequence. NX (nucleotide sequence) and PX (protein sequence) correspond to the divergent repeat that is a part of the molecule, but whose exact position with respect to other repeats could not be determined. It is followed by a canonical repeat (NX+1); note that only a part of the linker sequence following this repeat was determined). The terminal repeat is denoted N8, assuming that the total number of repeats is eight (see the text). This last repeat terminates with a stop codon (TGA, in bold and italics) and is followed by a long 3'-UTR. Only the sequence of the first repeat is shown in full, in the other repeats dots represent the same nucleotides (amino acid residues) as in the first repeat, letters indicate substitutions as compared to the first repeat, dashes in black represent deletions, dashes in gray correspond to missing data. Position coordinates are indicated on the left and on the right of each line. The actual position of the beginning of the divergent repeat (NX) is unknown, so it is indicated as "x" and the positions downstream of it are counted accordingly. Likewise, the exact coordinates of the 3'-region of the mRNA molecule are unknown, so the last nucleotide of the stop codon was arbitrarily indicated as "y" and positions upstream and downstream are counted accordingly. Regions corresponding to primers used for PCR amplification are indicated by black boxes, regions corresponding to internal primers used for sequencing are indicated by dark blue boxes. 1B. Schematic representation of the *RbcS* transcript. SL, splice leader sequence; SP, signal peptide sequence; TP, transit peptide sequence. The grey box represents a divergent subunit, although its exact position was not determined. Arrows indicate primers used for PCR and sequencing as in 1A. The dashed arrow represents a primer that anneals to the divergent subunit. 1C. Alignment of RBCS sequences from euglenophytes and selected green algae. Only the region corresponding to the mature processed RBCS protein is shown, for euglenophytes also the linker decapeptide is included at the end of the sequence. Both the canonical and the divergent forms of RBCS are shown for *E. longa*.
