# Supplementary material for: RuBisCO in Non-Photosynthetic Alga Euglena longa: Divergent Features, Transcriptomic Analysis and Regulation of Complex Formation
Source: PubMed Central journal article supplement (PMC4938576; doi:10.1371/journal.pone.0158790), 2016-07-08
Supplement: pone.0158790.s003.pdf [file pone.0158790.s003.pdf]

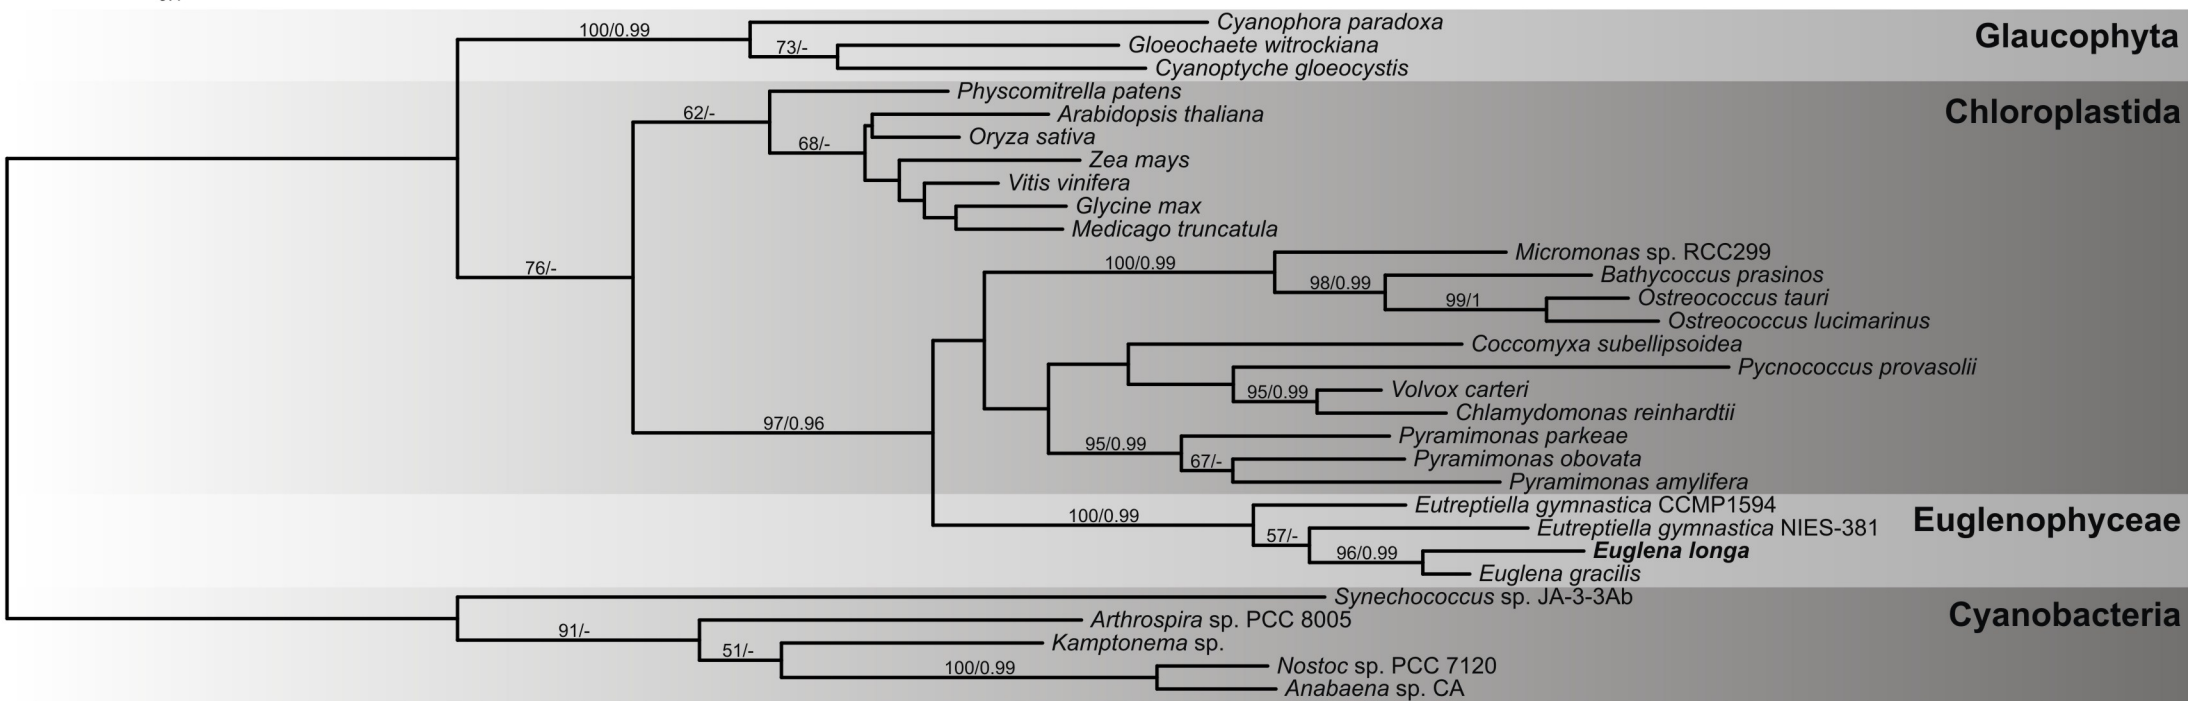

**Figure S3.** Phylogenetic tree of RCA protein sequences. The maximum-likelihood tree was inferred with RAxML using the LG+ $\Gamma$  substitution model. The bootstrap support values and posterior probabilities (from PhyloBayes) are indicated at branches when higher than 50% and 0.95, respectively. *E. longa* is in bold.
