# Supplementary material for: RuBisCO in Non-Photosynthetic Alga Euglena longa: Divergent Features, Transcriptomic Analysis and Regulation of Complex Formation
Source: PubMed Central journal article supplement (PMC4938576; doi:10.1371/journal.pone.0158790), 2016-07-08
Supplement: pone.0158790.s004.pdf [file pone.0158790.s004.pdf]

>E.longa\_GroEL  
MLAANSRKIWSWGLVASALAILAVGALSATPADFTPELLANTQMSKPIQMPAVA  
NSPSRMGSLHRAMPYTVAGSPKLDELYATASTPVKSRGPWVPIAFTALVSSVALMVAAFH  
QRRKKAVAVAAIAGSKWNFPMYSAIQPPI SRRTTTTCHAAKEIIFNETGEALKRMQAGVD  
KLSSCVGVTLGPKGRNVVLESNYGAPKIVNDGVTIAREIDLQDPVEAIGAKLVRQASQKT  
NDQAGDGTTTAIIILSHAFITEGMKIVAAGANPVQLTRGMEKTVAHLVQELKKLSKEVEDN  
ELAYVASVSAGGNIEVGEMISKAMARVGRRGVITMEESRGVDNDMYVVEGMQFERGFMSF  
YFVTDAERNLVHYDNARLLLVDMKITSARDVVNVLELSLQEGFPLIILAEGIEQEALATL  
VVNRLRGLSLKVC AIKAPGFGERKTQYLEDIAILTG GTVVKAELGLQLSKVGKEVLGTAAR  
VEITKDSTTIVGDGSTAPEVQARIRQIEGLLEAATADYEKDRLRERIARLSGGVAIIQVG  
ANTETELKDKKLRVEDALMATKAAVEEGIVIGGGCTLLALADRVDDIKGKLENDEQKVGA  
EIIKRALSYPRLRLVAHNAGENG FVVLENVRKLGKDMGFNAATGQYEDLMKSGIIDPTKVI  
RCCLNACSVAKLFLTSEAVVVEIPEKGAGA QKPNPADSSFTL-

>E.longa\_GroES  
MSPVLYGAVGRPAIPQPR SALPLLAAGALCAGALLGVVLSSADPTSLFTSPS  
LTAPRHATLAVSRAHRGHGPFTEPIRTV P DTTANAVEALHAEVSAQDETADQALPSTATA  
FWWALLAGCAGAMLSAMAGLFAK PQRPKSSSVHAVPLAMVAASGAHDYAGDLK KLTPLRD  
LVLVRVAPMEGTTTGGLVLPDVMQTKPTSGDVVAVGPKVSELKGEEC ILYSKFGVNLTEL  
EVGGQAHVLIREADIIGVLP RSPASSKDTPELKPLLDKVLVRKDAEPTNKLSGLIILQAAD  
ADAKYITGEVVAVGGGWTD SNGQFHALTVLPGQKVLFSKYAGDKLPTPGGPEYVCVAESE  
ILGVL-

**Figure S4.** GroEL/GroES homologs in *E. longa*. Protein sequences of GroEL/GroES homologs found in the *E. longa* transcriptome.
