# Supplementary material for: RuBisCO in Non-Photosynthetic Alga Euglena longa: Divergent Features, Transcriptomic Analysis and Regulation of Complex Formation
Source: PubMed Central journal article supplement (PMC4938576; doi:10.1371/journal.pone.0158790), 2016-07-08
Supplement: pone.0158790.s005.pdf [file pone.0158790.s005.pdf]

**TABLE S1.** List of PCR and qPCR primers used in this work. Coordinates for sequences in Fig. S1 are indicated.

| NAME          | SEQUENCE (5' - 3')         | COORDINATES IN FIG. S1 |
|---------------|----------------------------|------------------------|
| rbcL_F_qPCR   | GAAGTWAAAGGACATTATTTAAATG  | -                      |
| rbcL_R_qPCR   | CCACCAGACATACGAAGTGT       | -                      |
| RbcS_F_qPCR   | GGCTACTACGACAACCGTACTGG    | -                      |
| RbcS_R_qPCR   | AACGAGATCACCTGCACCTGCTTG   | -                      |
| Rrn18S_F_qPCR | CTTAGATCGCTGCCAGATCC       | -                      |
| Rrn18S_R_qPCR | GGCTGTGGATTCTCGTTGT        | -                      |
| RbcS_F1       | ATGCGATTGGACCGTCAGCCACTGCT | 23 - 48                |
| RbcS_F2       | CTCCTCTCCATCGCGTCCAAGAAGG  | 397 - 422              |
| RbcS_R        | CTTCTGCACTTCACCAAAAAGATGC  | y+255 - y+230          |
| RbcS-X_F      | GGAACCGTTCCATCGAGAGAACC    | x+11 - x+32            |
