# Supplementary material for: RuBisCO in Non-Photosynthetic Alga Euglena longa: Divergent Features, Transcriptomic Analysis and Regulation of Complex Formation
Source: PubMed Central journal article supplement (PMC4938576; doi:10.1371/journal.pone.0158790), 2016-07-08
Supplement: pone.0158790.s006.pdf [file pone.0158790.s006.pdf]

**TABLE S2.** List of the RBCL sequences used in phylogenetic analysis. Accession numbers for GenBank entries and contig ids for MMETSP\* are listed.

|                                       | ORGANISM                                | SOURCE (Database)                 | ACCESSION NUMBER/CONTIG |                  |
|---------------------------------------|-----------------------------------------|-----------------------------------|-------------------------|------------------|
| Euglenozoa                            | <i>Euglena longa</i>                    | GenBank                           | NP_074963               |                  |
|                                       | <i>Euglena gracilis</i> Z               | GenBank                           | NP_041936               |                  |
|                                       | <i>Euglena viridis</i> NJ001            | GenBank                           | YP_007517056            |                  |
|                                       | <i>Eugleniformis proxima</i>            | GenBank                           | YP_009032761            |                  |
|                                       | <i>Eutreptiella gymnastica</i> K-0333   | GenBank                           | YP_006234185            |                  |
|                                       | <i>Eutreptiella gymnastica</i> CCMP1594 | MMETSP                            | CAMNT_0046485463        |                  |
|                                       | <i>Eutreptia viridis</i>                | GenBank                           | AEQ94204                |                  |
|                                       | <i>Colacium vesiculosum</i>             | GenBank                           | AEW12959                |                  |
|                                       | <i>Monomorphina aenigmatica</i>         | GenBank                           | YP_007317188            |                  |
|                                       | <i>Strombomonas acuminata</i>           | GenBank                           | AEW12993                |                  |
|                                       | <i>Cryptoglana skujai</i>               | GenBank                           | AKL39014                |                  |
|                                       | <i>Euglena gracilis bacillaris</i>      | GenBank                           | AKL82391                |                  |
|                                       | <i>Euglena viridis</i> SAG 224-17d      | GenBank                           | AKL79017                |                  |
|                                       | <i>Euglenaria anabaena</i>              | GenBank                           | AKJ83339                |                  |
|                                       | <i>Monomorphina parapryum</i>           | GenBank                           | AKL78929                |                  |
|                                       | <i>Trachelomonas volvocina</i>          | GenBank                           | AKL82413                |                  |
|                                       | Chloroplastida                          | <i>Chlamydomonas reinhardtii</i>  | GenBank                 | NP_958405        |
| <i>Chlamydomonas moewusii</i>         |                                         | GenBank                           | ABU88322                |                  |
| <i>Arabidopsis thaliana</i>           |                                         | GenBank                           | NP_051067               |                  |
| <i>Oryza sativa</i>                   |                                         | GenBank                           | YP_654221               |                  |
| <i>Ostreococcus tauri</i>             |                                         | GenBank                           | YP_717262               |                  |
| <i>Glycine max</i>                    |                                         | GenBank                           | YP_538747               |                  |
| <i>Medicago truncatula</i>            |                                         | GenBank                           | YP_001381744            |                  |
| <i>Micromonas</i> sp. RCC299          |                                         | GenBank                           | ACO55540                |                  |
| <i>Zea mays</i>                       |                                         | GenBank                           | NP_043033               |                  |
| <i>Vitis vinifera</i>                 |                                         | GenBank                           | YP_567084               |                  |
| <i>Selaginella moellendorffii</i>     |                                         | GenBank                           | ADH10411                |                  |
| <i>Volvox carteri</i>                 |                                         | GenBank                           | ACY06055                |                  |
| <i>Physcomitrella patens</i>          |                                         | GenBank                           | NP_904194               |                  |
| <i>Pyramimonas amyliifera</i>         |                                         | MMETSP                            | CAMNT_0041901623        |                  |
| <i>Pyramimonas obovata</i>            |                                         | MMETSP                            | CAMNT_0006873903        |                  |
| <i>Pyramimonas parkeae</i>            |                                         | GenBank                           | YP_002600925            |                  |
| <i>Dunaliella salina</i>              |                                         | GenBank                           | ACS95083                |                  |
| <i>Haematococcus pluvialis</i>        |                                         | GenBank                           | ACJ64122                |                  |
| <i>Chloromonas</i> sp. ANT3           |                                         | GenBank                           | AAD00447                |                  |
| <i>Chlorella vulgaris</i>             |                                         | GenBank                           | NP_045897               |                  |
| <i>Auxenochlorella protothecoides</i> |                                         | GenBank                           | YP_009019341            |                  |
| <i>Aneura mirabilis</i>               |                                         | GenBank                           | YP_001687224            |                  |
| <i>Orobanche corymbosa</i>            |                                         | GenBank                           | AAC49722                |                  |
| <i>Orobanche fasciculata</i>          |                                         | GenBank                           | AAC49723                |                  |
| <i>Orobanche californica</i>          |                                         | GenBank                           | YP_009108392            |                  |
| <i>Harveya capensis</i>               |                                         | GenBank                           | AAAY98036               |                  |
| <i>Harveya stenosiphon</i>            |                                         | GenBank                           | AAAY98035               |                  |
| <i>Harveya coccinea</i>               |                                         | GenBank                           | AAAY98034               |                  |
| Glaucophyta                           |                                         | <i>Cyanophora paradoxa</i>        | GenBank                 | NP_043240        |
|                                       |                                         | <i>Cyanoptyche gloeocystis</i>    | MMETSP                  | CAMNT_0041991067 |
| Cyanobacteria                         |                                         | <i>Synechococcus</i> sp. JA-3-3Ab | GenBank                 | Q2JV67           |
|                                       |                                         | <i>Gloeobacter violaceus</i>      | GenBank                 | NP_925102        |
|                                       |                                         | <i>Anabaena variabilis</i>        | GenBank                 | ABA23512         |
|                                       | <i>Acaryochloris marina</i>             | GenBank                           | B0CCC1                  |                  |
|                                       | <i>Cyanothece</i> sp. PCC 7425          | GenBank                           | B8HQS5                  |                  |
| Chlorarachniophyta                    | <i>Bigelowiella natans</i>              | GenBank                           | YP_778601               |                  |
|                                       | <i>Lotharella</i> sp. CCMP622           | GenBank                           | AGY61412                |                  |

\*MMETSP - Marine Microbial Eukaryote Transcriptome Sequencing Project (<http://marinemicroeukaryotes.org/>)
