# Supplementary material for: RuBisCO in Non-Photosynthetic Alga Euglena longa: Divergent Features, Transcriptomic Analysis and Regulation of Complex Formation
Source: PubMed Central journal article supplement (PMC4938576; doi:10.1371/journal.pone.0158790), 2016-07-08
Supplement: pone.0158790.s007.pdf [file pone.0158790.s007.pdf]

**TABLE S3.** List of the RBCS sequences used in phylogenetic analysis. Accession numbers for GenBank entries and contig ids for MMETSP\* are listed.

|                                     | ORGANISM                                | SOURCE (Database)                   | ACCESSION NUMBER/CONTIG |                  |
|-------------------------------------|-----------------------------------------|-------------------------------------|-------------------------|------------------|
| Euglenozoa                          | <i>Euglena longa</i>                    | GenBank                             | KT818574                |                  |
|                                     | <i>Euglena gracilis</i>                 | GenBank                             | 132143                  |                  |
|                                     | <i>Eutreptiella gymnastica</i> CCMP1594 | MMETSP                              | CAMNT_0046443149        |                  |
|                                     | <i>Eutreptiella gymnastica</i> NIES-381 | MMETSP                              | CAMNT_0000678951        |                  |
| Chloroplastida                      | <i>Chlamydomonas reinhardtii</i>        | GenBank                             | XP_001702409            |                  |
|                                     | <i>Arabidopsis thaliana</i> 1B          | GenBank                             | NP_198659               |                  |
|                                     | <i>Arabidopsis thaliana</i> 2B          | GenBank                             | NP_198658               |                  |
|                                     | <i>Arabidopsis thaliana</i> 3B          | GenBank                             | NP_001119331            |                  |
|                                     | <i>Oryza sativa</i>                     | GenBank                             | AAR19268                |                  |
|                                     | <i>Ostreococcus tauri</i>               | GenBank                             | XP_003084235            |                  |
|                                     | <i>Osterococcus lucimarinus</i>         | GenBank                             | XP_001422165            |                  |
|                                     | <i>Glycine max</i>                      | GenBank                             | AF303939                |                  |
|                                     | <i>Medicago truncatula</i>              | GenBank                             | KEH21539                |                  |
|                                     | <i>Micromonas pusilla</i>               | GenBank                             | XP_003064624            |                  |
|                                     | <i>Zea mays</i>                         | GenBank                             | CAA70416                |                  |
|                                     | <i>Vitis vinifera</i>                   | GenBank                             | XP_002276967            |                  |
|                                     | <i>Selaginella moellendorffii</i>       | GenBank                             | XP_002991566            |                  |
|                                     | <i>Volvox carteri</i>                   | GenBank                             | XP_002955679            |                  |
|                                     | <i>Physcomitrella patens</i>            | GenBank                             | BAC87878                |                  |
|                                     | <i>Pyramimonas amyliifera</i>           | MMETSP                              | CAMNT_0041894263        |                  |
|                                     | <i>Pyramimonas obovata</i>              | MMETSP                              | CAMNT_0006872053        |                  |
|                                     | <i>Pyramimonas parkeae</i>              | MMETSP                              | CAMNT_0035469105        |                  |
|                                     | <i>Chlamydomonas moewusii</i>           | GenBank                             | P17537                  |                  |
|                                     | <i>Dunaliella salina</i>                | GenBank                             | AAU93597                |                  |
|                                     | <i>Haematococcus pluvialis</i>          | GenBank                             | ABB17556                |                  |
|                                     | <i>Chloromonas</i> sp.                  | GenBank                             | AAD00448                |                  |
|                                     | <i>Bathycoccus prasinos</i>             | GenBank                             | XP_007511178            |                  |
|                                     | <i>Coccomyxa subellipsoidea</i>         | GenBank                             | XP_005648578            |                  |
|                                     | <i>Auxenochlorella protothecoides</i>   | GenBank                             | KFM22871                |                  |
|                                     | Glaucophyta                             | <i>Cyanophora paradoxa</i>          | GenBank                 | NP_043239        |
|                                     |                                         | <i>Cyanoptyche gloeocystis</i>      | MMETSP                  | CAMNT_0041991067 |
|                                     | Cyanobacteria                           | <i>Synechococcus</i> sp. JA-3-3Ab   | GenBank                 | YP_474645        |
|                                     |                                         | <i>Gloeobacter violaceus</i>        | GenBank                 | NP_925104        |
|                                     |                                         | <i>Anabaena variabilis</i>          | GenBank                 | YP_324405        |
|                                     |                                         | <i>Acaryochloris marina</i>         | GenBank                 | YP_001516118     |
|                                     |                                         | <i>Cyanothece</i> sp. PCC 7425      | GenBank                 | WP_012628805     |
|                                     | Chlorarachniophyta                      | <i>Amorphochlora amoebiformis</i> 1 | GenBank                 | ABW97363         |
| <i>Amorphochlora amoebiformis</i> 2 |                                         | GenBank                             | ABW97364                |                  |
| <i>Amorphochlora amoebiformis</i> 3 |                                         | GenBank                             | ABW97365                |                  |
| <i>Bigelowiella natans</i> 1        |                                         | GenBank                             | AAP79188                |                  |
| <i>Bigelowiella natans</i> 2        |                                         | GenBank                             | AAP79189                |                  |
| <i>Gymnochlora stellata</i>         |                                         | GenBank                             | ACF24549                |                  |

\*MMETSP - Marine Microbial Eukaryote Transcriptome Sequencing Project (<http://marinemicroeukaryotes.org/>)
