# Supplementary material for: RuBisCO in Non-Photosynthetic Alga Euglena longa: Divergent Features, Transcriptomic Analysis and Regulation of Complex Formation
Source: PubMed Central journal article supplement (PMC4938576; doi:10.1371/journal.pone.0158790), 2016-07-08
Supplement: pone.0158790.s008.pdf [file pone.0158790.s008.pdf]

**TABLE S4.** List of the RCA sequences used in phylogenetic analysis. Accession numbers for GenBank entries, contig ids for MMETSP<sup>a</sup>, and EST id for the CGP<sup>b</sup> are listed.

|                | ORGANISM                                | SOURCE (Database) | ACCESSION NUMBER/CONTIG      |
|----------------|-----------------------------------------|-------------------|------------------------------|
| Euglenozoa     | <i>Euglena longa</i>                    | GenBank           | KT818573                     |
|                | <i>Euglena gracilis</i>                 | GenBank           | EC682479; EC679240; EG565129 |
|                | <i>Eutreptiella gymnastica</i> CCMP1594 | MMETSP            | CAMNT_0046458117             |
|                | <i>Eutreptiella gymnastica</i> NIES-381 | MMETSP            | CAMNT_0000686649             |
| Chloroplastida | <i>Chlamydomonas reinhardtii</i>        | GenBank           | XP_001692244                 |
|                | <i>Arabidopsis thaliana</i>             | GenBank           | NP_565913                    |
|                | <i>Oryza sativa</i>                     | GenBank           | P93431                       |
|                | <i>Ostreococcus tauri</i>               | GenBank           | XP_003078787                 |
|                | <i>Ostreococcus lucimarinus</i>         | GenBank           | ABO95802                     |
|                | <i>Glycine max</i>                      | GenBank           | ADD60244                     |
|                | <i>Medicago truncatula</i>              | GenBank           | XP_003604901                 |
|                | <i>Micromonas</i> sp. RCC299            | GenBank           | XP_002501510                 |
|                | <i>Zea mays</i>                         | GenBank           | NP_001104921                 |
|                | <i>Vitis vinifera</i>                   | GenBank           | XP_002270571                 |
|                | <i>Volvox carteri</i>                   | GenBank           | XP_002951971                 |
|                | <i>Physcomitrella patens</i>            | GenBank           | EDQ82463                     |
|                | <i>Pycnococcus provasolii</i>           | MMETSP            | CAMNT_0053510249             |
|                | <i>Pyramimonas amyliifera</i>           | MMETSP            | CAMNT_0041893585             |
|                | <i>Pyramimonas obovata</i>              | MMETSP            | CAMNT_0006861995             |
|                | <i>Pyramimonas parkeae</i>              | MMETSP            | CAMNT_0035452761             |
|                | <i>Coccomyxa subellipsoidea</i>         | GenBank           | XP_005651127                 |
|                | <i>Bathycoccus prasinos</i>             | GenBank           | XP_007512493                 |
| Glaucophyta    | <i>Cyanophora paradoxa</i>              | CGP               | EST111910                    |
|                | <i>Cyanoptyche gloeocystis</i>          | MMETSP            | CAMNT_0041989161             |
|                | <i>Gloeochaete witrockiana</i>          | MMETSP            | CAMNT_0038655913             |
| Cyanobacteria  | <i>Synechococcus</i> sp. JA-3-3Ab       | GenBank           | WP_011429335                 |
|                | <i>Anabaena</i> sp. CA                  | GenBank           | Q06721                       |
|                | <i>Nostoc</i> sp. PCC 7120              | GenBank           | P58555                       |
|                | <i>Arthrospira</i> sp. PCC 8005         | GenBank           | CDM97162                     |
|                | <i>Kamptonema</i> sp.                   | GenBank           | WP_007357073                 |

<sup>a</sup>MMETSP - Marine Microbial Eukaryote Transcriptome Sequencing Project (<http://marinemicroeukaryotes.org/>)

<sup>b</sup>CGP - Cyanophora Genome Project (<http://cyanophora.rutgers.edu/cyanophora/home.php>)
